# Supplementary material for: Selenium metabolism and excretion in mice after injection of 82Se-enriched selenomethionine
Source: Royal Society of Chemistry journal article supplement (doi:10.1039/c3mt20267d), 2013-01-01

### Supplemental data

Fig. S1. Size-exclusion chromatograms of  $^{82}\text{Se}$  (a) in the hepatic cytosolic fraction at 1 h after injection of mice fed the Se-adequate diet and of standards for (b) cGPx, (c) selenosugar, and (d) SeMet.

Fig. S2. Reverse-phase chromatograms of  $^{82}\text{Se}$  (a) in the hepatic cytosolic fraction at 1 h after injection of mice fed the Se-adequate diet and of standards for (b) SeMet and (c) selenosugar.

Fig. S1

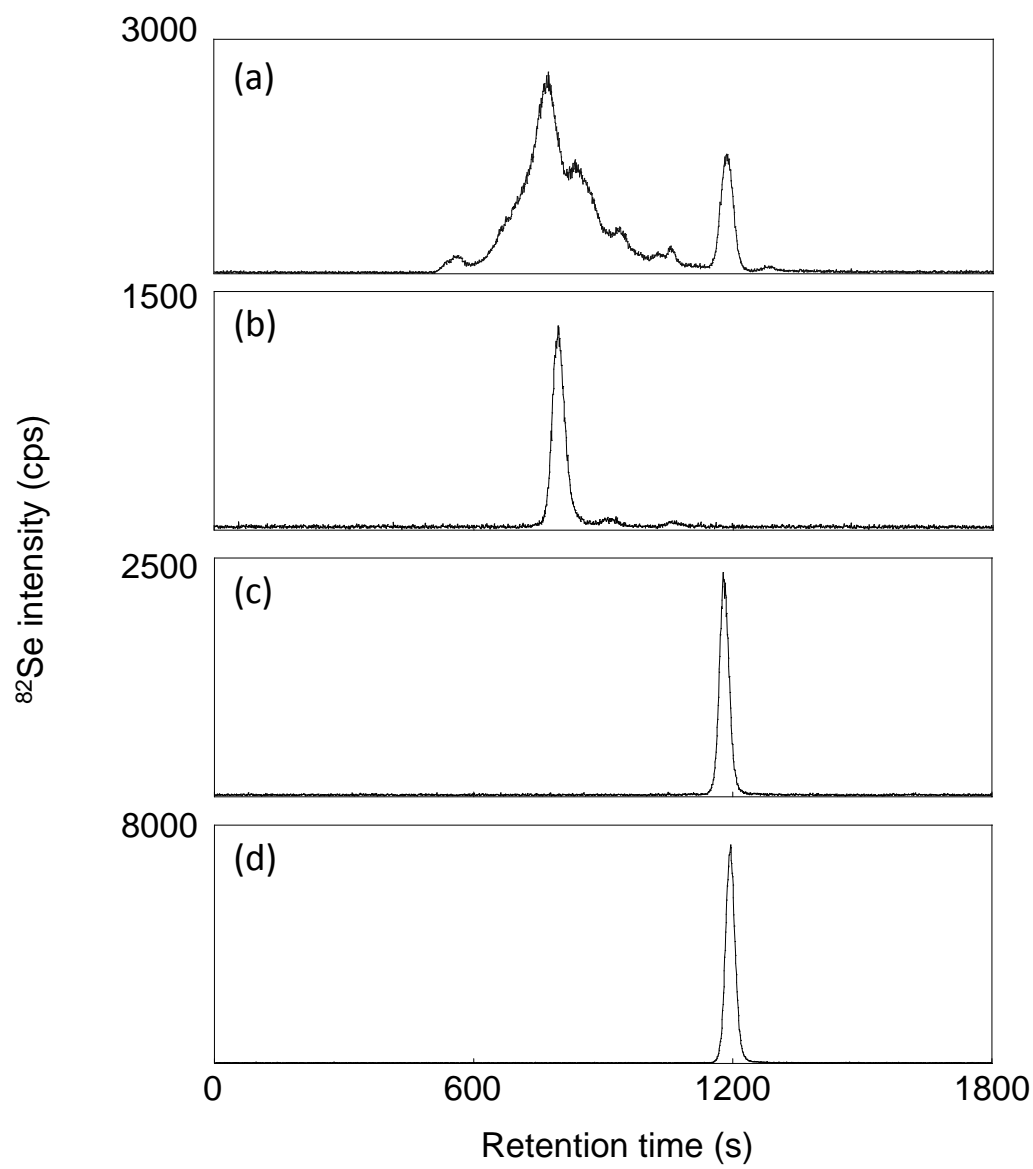

Fig. S2

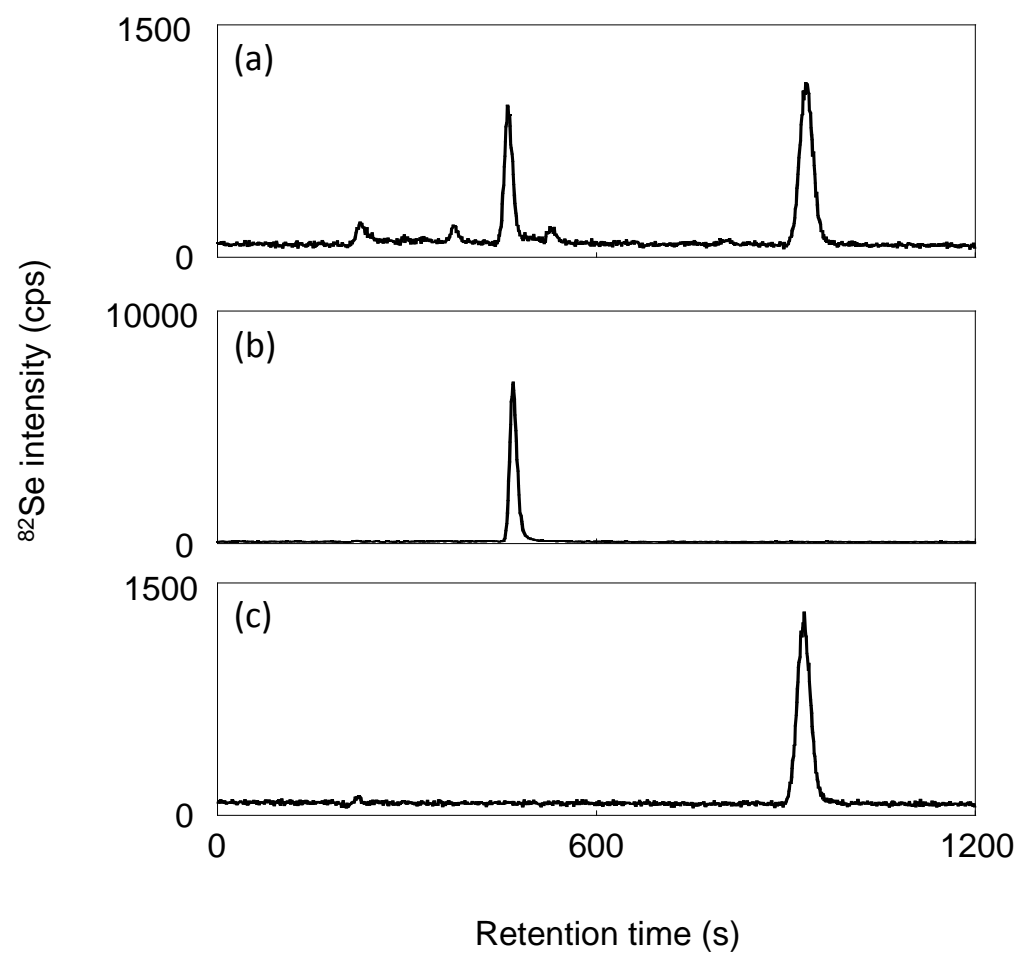

Supplement: c3mt20267d.pdf [file c3mt20267d.pdf]
